# Supplementary material
Source: PubMed Central journal article supplement (PMC5710745)
Supplement: NIHMS921579-supplement-Supporting_Information.pdf [file NIHMS921579-supplement-Supporting_Information.pdf]

## Supplementary Materials for

### **X-ray Absorption Spectroscopy Reveals an Organometallic Ni-C bond in the CO-treated form of Acetyl-CoA Synthase**

**Authors:** Mehmet Can,<sup>1</sup> ‡ Logan J. Giles,<sup>2,3</sup> ‡ Stephen W. Ragsdale<sup>1\*</sup>, Ritimukta Sarangi<sup>2\*</sup>

<sup>1</sup>Department of Biological Chemistry, University of Michigan, Ann Arbor, MI 48109-0606.

<sup>2</sup>Stanford Synchrotron Radiation Lightsource, SLAC National Accelerator Laboratory, Menlo Park, CA 94025 · <sup>3</sup>Department of Chemistry, Stanford University, Stanford, CA 94306

\*Address correspondence to: Ritimukta Sarangi ([ritis@slac.stanford.edu](mailto:ritis@slac.stanford.edu)) and Stephen W. Ragsdale ([sragdsal@umich.edu](mailto:sragdsal@umich.edu))

‡These authors contributed equally to this work.

#### **This PDF file includes:**

Figs. S1 to S4  
Tables S1 to S4  
References 1-5  
Sample DFT Input File

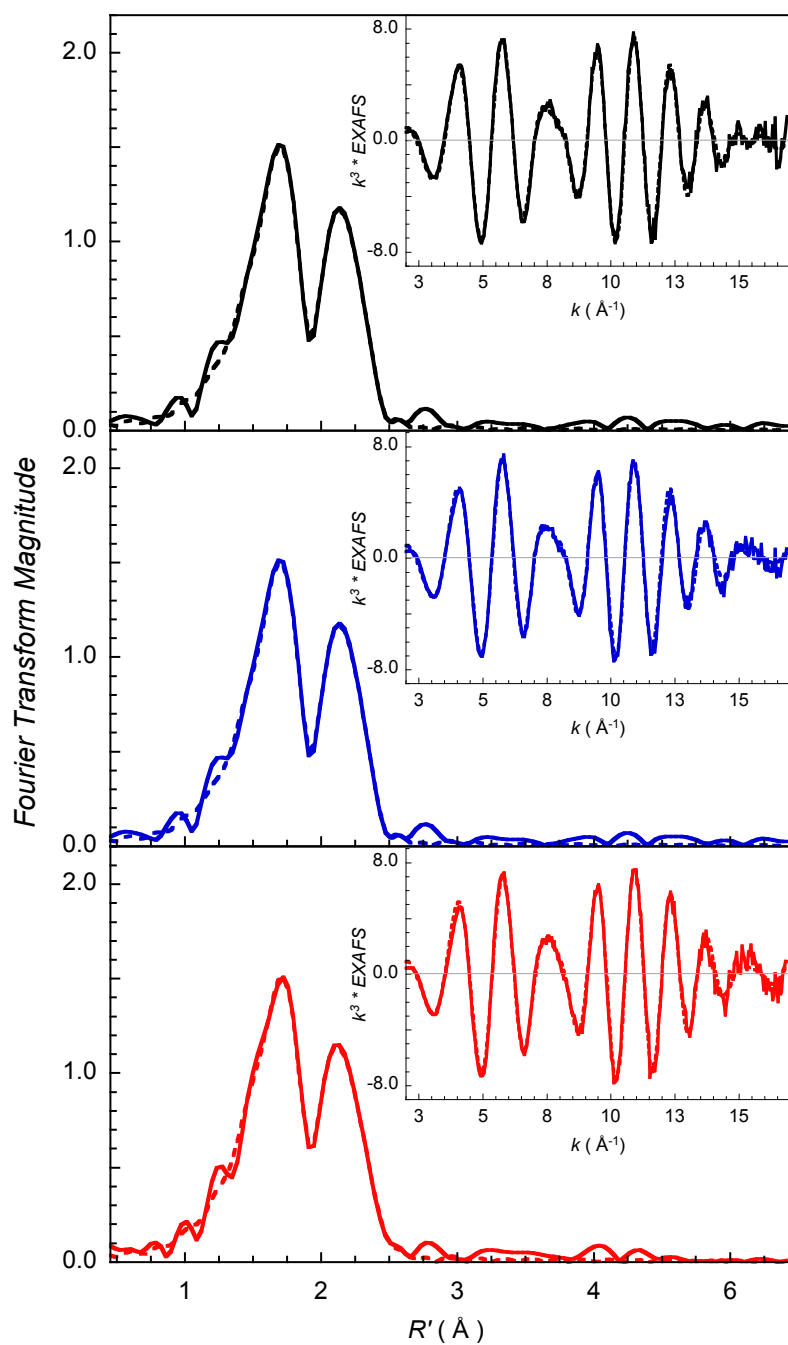

**Fig. S1. FEFF fits to the Fe K-edge EXAFS data for the three forms of ACS.** FEFF fits to the Fe K-edge EXAFS data for A<sub>OX</sub> (—), A<sub>RED</sub> (—) and A<sub>NiFeC</sub> (—). Non-phase shift corrected Fourier Transform and their corresponding EXAFS (inset) ( $k = 2-17 \text{ \AA}^{-1}$ ). Data (—), Fit (---)

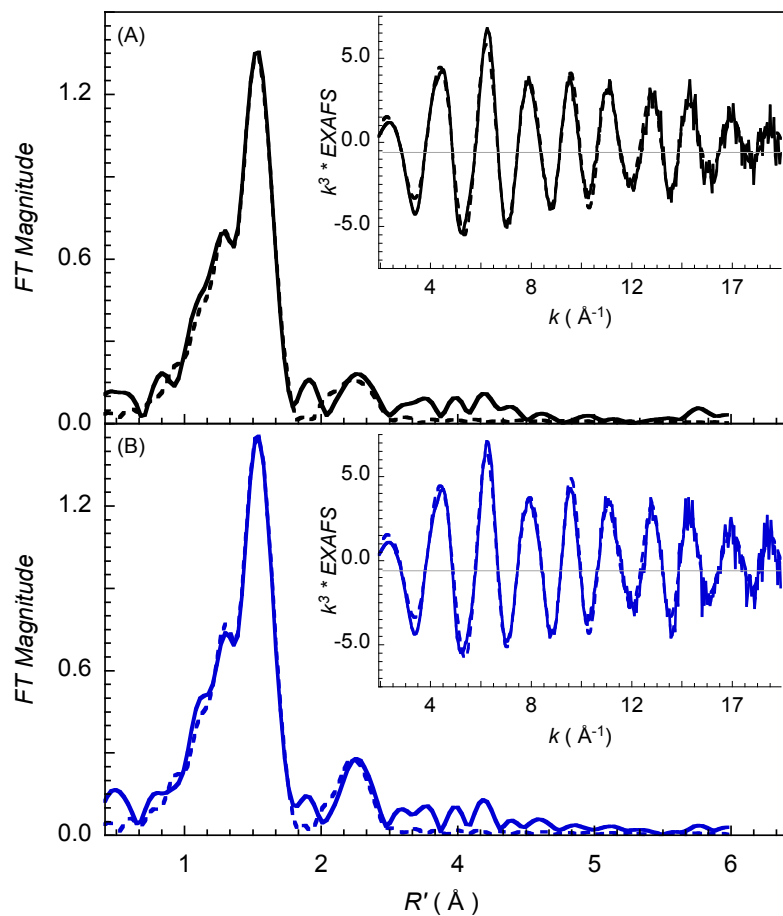

**Fig. S2. FEFF fits to the Ni K-edge EXAFS data for the  $A_{\text{OX}}$  and  $A_{\text{RED}}$  forms of ACS.** FEFF fits to the Ni-EXAFS data for  $A_{\text{OX}}$  (A) and  $A_{\text{RED}}$  (B). Non-phase shift corrected Fourier Transform and their corresponding EXAFS (inset) ( $k = 2\text{-}18.6 \text{ Å}^{-1}$ ). Data (—), Fit (----)

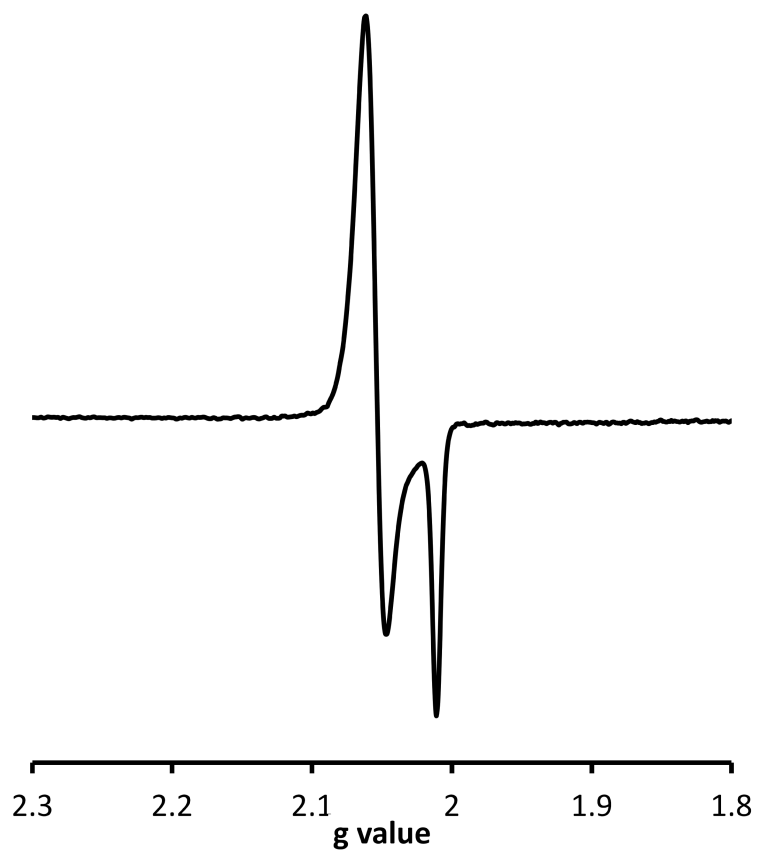

**Fig. S3.** EPR spectrum of the  $A_{NiFeC}$  sample used in these studies.

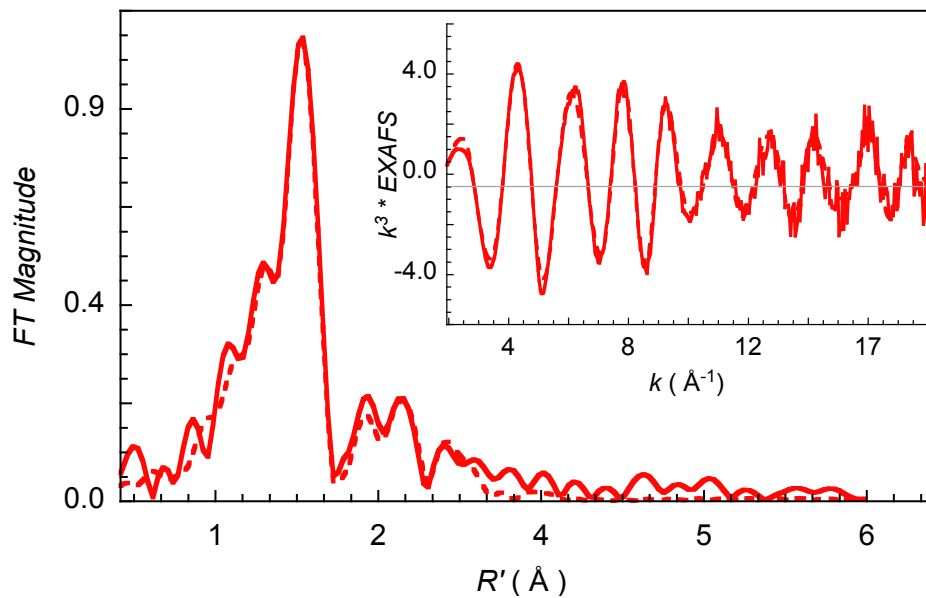

**Fig. S4. FEFF fits to the Ni K-edge EXAFS data for the CO-bound form of ACS.** FEFF fits to the Ni-EXAFS data for  $A_{\text{NiFeC}}$ . Non-phase shift corrected Fourier Transform and their corresponding EXAFS (inset) ( $k = 2\text{-}18.6 \text{ \AA}^{-1}$ ). Data (—), Fit (----)

**Table S1. Fe K-edge EXAFS Curve-Fitting Results for ACS**

| ACS                | Coordination/Path      | R(Å) <sup>a</sup> | σ <sup>2</sup> (Å <sup>2</sup> ) <sup>b</sup> | ΔE <sub>0</sub> (eV) | F <sup>c</sup> |
|--------------------|------------------------|-------------------|-----------------------------------------------|----------------------|----------------|
| A <sub>OX</sub>    | 4 Fe-S                 | 2.30              | 486                                           | -7.64                | 0.27           |
|                    | 2.5 Fe-Fe <sup>d</sup> | 2.73              | 459                                           |                      |                |
|                    | 1 Fe-C                 | 2.94 <sup>e</sup> | 182                                           |                      |                |
| A <sub>RED</sub>   | 4 Fe-S                 | 2.30              | 512                                           | -7.49                | 0.29           |
|                    | 2.5 Fe-Fe <sup>a</sup> | 2.73              | 484                                           |                      |                |
|                    | 1 Fe-C                 | 2.94 <sup>e</sup> | 402                                           |                      |                |
| A <sub>NiFeC</sub> | 4 Fe-S                 | 2.30              | 466                                           | -7.45                | 0.34           |
|                    | 2.5 Fe-Fe <sup>a</sup> | 2.73              | 479                                           |                      |                |
|                    | 1 Fe-C                 | 2.96 <sup>e</sup> | 204                                           |                      |                |

<sup>a</sup>The estimated standard deviations for the distances are in order of ± 0.02 Å.

<sup>b</sup>The σ<sup>2</sup> values are multiplied by 10<sup>5</sup>. A / indicates that the σ<sup>2</sup> value was linked to the previous path. <sup>c</sup>Error is given by [Σ[(χ<sub>obsd</sub> - χ<sub>calcd</sub>)<sup>2</sup> k<sup>6</sup>]/(N<sub>data</sub> - N<sub>var</sub>)].

<sup>d</sup>The data can accommodate 3 Fe-Fe contributions with slightly worse Error values. The bond distances and rest of the fit parameters remain unchanged.

<sup>e</sup>The Fe-C component results from the cysteine carbon. It has a very small contribution to the EXAFS data. The S<sub>0</sub><sup>2</sup> factor was set at 1.

**Table S2. Previously published EXAFS data on ACS**

|        | Lindahl<br>1995 <sup>1</sup> |          | Lindahl<br>1998 <sup>2</sup> | Cramer<br>2003 <sup>3</sup> |                           | Svetlitchnyi<br>2004 <sup>a,4</sup> | Schrapers<br>2016 <sup>5</sup> |                       |
|--------|------------------------------|----------|------------------------------|-----------------------------|---------------------------|-------------------------------------|--------------------------------|-----------------------|
|        | As-iso                       | Reduced  | Phen-treated                 | As-iso                      | Ti <sup>3+</sup> -Treated | Oxidized                            | Oxidized                       | Reduced               |
| Ni-N   | (2) 1.89                     | (2) 1.89 | (2) 1.87                     | (1.5) 1.89                  | (1.5) 1.89                | (2) 1.86                            | (1-2) 1.98                     | (1-2) 1.99            |
| Ni-S   | (2) 2.19                     | (2) 2.19 | (2) 2.20                     | (2.5) 2.19                  | (2.5) 2.19                | (2.5) 2.17                          | (2) 2.2                        | (2) 2.24              |
| Ni-O/S |                              |          |                              |                             |                           | (0.5) 2.32                          | (1) 2.60 <sup>b</sup>          | (1) 2.62 <sup>b</sup> |
| Ni-Fe  |                              |          |                              |                             | (0.5) 2.80                | (0.5) 2.71                          | (0.5) 2.69                     | (0.5) 2.64            |
| Ni-Ni  |                              |          |                              | (1) 2.96                    | (1) 2.97                  | (1) 2.89                            | (0.5) 2.91                     | (0.5) 2.98            |

<sup>a</sup>The average Ni-ligand distance is reproduced here. <sup>b</sup>This is a Ni-S interaction.

**Table S3. The DFT calculated Löwdin Spin Densities of  $A_{\text{NiFeC}}$** 

The spin-densities reported in Table S3 shows that the  $[\text{Fe}_4\text{S}_4]^{2+}$  cluster has converged to the correct ground state for both  $A_{\text{OX}}$  and  $A_{\text{NiFeC}}$  with two Fe(III) and two Fe(II) centers that are antiferromagnetically coupled with the  $\text{Fe}_4\text{S}_4$

|                                        | Löwdin Spin Population |                    |
|----------------------------------------|------------------------|--------------------|
|                                        | $A_{\text{OX}}$        | $A_{\text{NiFeC}}$ |
| $\text{Ni}_p$                          | 0.09                   | 0.49               |
| $\text{Ni}_d$                          | 0.00                   | 0.25               |
| $\text{Fe}_1$                          | 3.10                   | 3.04               |
| $\text{Fe}_2$                          | -2.99                  | 2.98               |
| $\text{Fe}_3$                          | -3.08                  | -3.00              |
| $\text{Fe}_4$                          | 2.99                   | -3.00              |
| Four Sulfide of $4\text{Fe}_4\text{S}$ | 0.02                   | 0.02               |
| Bridging Cysteine                      | 0.05                   | -0.01              |
| Remaining Cysteine                     | -0.18                  | 0.19               |
| Protein backbone ligand                | 0.01                   | 0.06               |
| $\text{H}_2\text{O}/\text{CO}$         | 0.01                   | -0.04              |

**Table S4. The DFT calculated Molecular Orbital Contributions of the valance orbitals of  $A_{\text{NiFeC}}$  resulting in the Ni K-pre-edge transition.**

|                                 | 0a -> 284a | 0a -> 285a | 0b -> 273b | 0b -> 284b | 0b -> 285b |
|---------------------------------|------------|------------|------------|------------|------------|
| $\text{Ni}_p$ , D orbitals only | 12.1       | 11.1       | 34.0       | 14.1       | 12.8       |
| $\text{Ni}_d$ , D orbitals only | 0.3        | 0.6        | 17.1       | 0.3        | 0.7        |
| $4\text{Fe}_4\text{S}$ cluster  | 0.8        | 2.8        | 21.5       | 0.2        | 1.9        |
| CO ligand                       | 58.3       | 69.1       | 2.9        | 53.2       | 67.8       |
| Bridging Cysteine ligand        | 2.3        | 7.1        | 15.2       | 1.8        | 7.2        |
| Remaining Cysteine ligands      | 0.1        | 0.2        | 1.0        | 0.1        | 0.2        |
| N atoms of amidate, N only      | 0.1        | 0.1        | 1.5        | 0.1        | 0.2        |
| Remaining amidate ligand        | 26.0       | 9.1        | 6.5        | 30.2       | 9.4        |

The Mulliken MO populations reported above shows that the orbitals involved in the Ni K-pre-edge transition (the two alpha and three beta LUMO orbitals) are strongly delocalized over the two Ni centers, the bridged S(Cys) groups and the  $[\text{Fe}_4\text{S}_4]^{2+}$  cluster. TD-DFT contribution to the pre-edge reported in Table S4 are at least 5% or higher of the total TD-DFT intensity. This includes a contribution from orbitals with strong  $\text{Ni}_d$  d orbital contribution (both alpha and beta). Due its square planar nature, the sum of total contribution from these orbitals is < 9% consistent with dominant quadrupole character.



EXAMPLE of input file for optimization of  $A_{\text{NiFeC}}$ :

```
# GO NiFeC active site, fully optimized with 6 alpha carbons fixed. 1RU3 structure modified  
#
```

```
! UKS BP86 normalscf opt SlowConv grid4 nofinalgrid PAL8
```

```
%output PrintLevel Normal  
  Print[P_MOs] 1  
  Print[P_Overlap] 1  
end
```

```
%cosmo epsilon 7  
end
```

```
%basis basis TZVP  
end
```

```
%scf  
maxiter 1500  
DIISMAXEq 20  
directresetfreq 1  
end
```

```
%geom constraints  
  {C 5 C}  
  {C 8 C}  
  {C 2 C}  
  {C 11 C}  
  {C 34 C}  
  {C 14 C}  
end  
end
```

```
%Method SpecialGridAtoms 28  
  SpecialGridIntAcc 7  
end
```

```
* xyz -3 2  
Ni    0.00000    0.00000    0.00000 newgto "TZVPP" end  
Ni    0.00000    0.00000    2.82804 newgto "TZVPP" end  
C    -6.51393   -5.56487   -4.68891  
C    -6.60172   -4.14251   -4.15938  
S    -5.31721   -3.10937   -5.08857  
C     0.76978   -3.80939   -2.68858  
C     0.28694   -3.11375   -1.41892  
S    -0.20223   -1.41714   -1.75705
```

|    |          |          |          |
|----|----------|----------|----------|
| C  | -7.18390 | -5.95800 | 0.35811  |
| C  | -7.02274 | -4.52585 | -0.17754 |
| S  | -6.26650 | -3.29453 | 0.87864  |
| C  | -4.47599 | 3.63365  | 0.97393  |
| C  | -3.84846 | 3.19072  | -0.33406 |
| S  | -5.18753 | 2.67710  | -1.54032 |
| C  | -2.55577 | -3.82648 | 5.95519  |
| C  | -1.19308 | -3.92884 | 5.26364  |
| O  | -0.40470 | -4.77327 | 5.61856  |
| N  | -0.91479 | -3.06907 | 4.27833  |
| C  | 0.36952  | -3.12693 | 3.58124  |
| C  | 1.31907  | -2.19056 | 4.27660  |
| O  | 2.19730  | -2.61815 | 5.08062  |
| C  | 0.17332  | -2.77789 | 2.08957  |
| S  | -1.05832 | -1.51810 | 1.76660  |
| N  | 1.14315  | -0.89609 | 4.06580  |
| C  | 2.03907  | 0.03476  | 4.75946  |
| C  | 1.69369  | 1.46001  | 4.41951  |
| O  | 2.22011  | 2.41710  | 4.98436  |
| N  | 0.71909  | 1.59032  | 3.53884  |
| C  | 0.29906  | 2.87770  | 3.04102  |
| C  | -1.00375 | 3.35598  | 3.71827  |
| O  | -1.59725 | 4.34369  | 3.29102  |
| C  | 0.03602  | 2.66820  | 1.59704  |
| S  | -1.12052 | 1.25711  | 1.59317  |
| N  | -1.48668 | 2.65324  | 4.73868  |
| C  | -2.71577 | 3.09439  | 5.39597  |
| Fe | -4.68959 | -1.85456 | -3.38446 |
| Fe | -5.03546 | -2.03894 | -0.74710 |
| Fe | -4.79855 | 0.41194  | -1.85949 |
| Fe | -2.60137 | -1.17873 | -1.68762 |
| S  | -3.67251 | -0.32912 | 0.01842  |
| S  | -3.23070 | 0.00263  | -3.64902 |
| S  | -3.46332 | -3.33303 | -2.00004 |
| S  | -6.45496 | -0.97382 | -2.21453 |
| C  | 1.36905  | 0.94782  | -0.56037 |
| H  | -7.22969 | -6.17859 | -4.18301 |
| H  | -5.53013 | -5.94916 | -4.51756 |
| H  | -6.72019 | -5.56795 | -5.73884 |
| H  | -6.39141 | -4.12960 | -3.11034 |
| H  | -7.58400 | -3.74504 | -4.30789 |
| H  | 1.05374  | -4.81499 | -2.45833 |
| H  | 1.61249  | -3.28277 | -3.08535 |
| H  | -0.01835 | -3.81812 | -3.41223 |
| H  | 1.07817  | -3.11243 | -0.69861 |
| H  | -0.56288 | -3.64409 | -1.04285 |

|   |          |          |          |
|---|----------|----------|----------|
| H | -7.64922 | -6.56762 | -0.38804 |
| H | -7.79314 | -5.94340 | 1.23761  |
| H | -6.22147 | -6.35965 | 0.59755  |
| H | -8.00094 | -4.17028 | -0.42574 |
| H | -6.33564 | -4.62812 | -0.99138 |
| H | -3.70658 | 3.92543  | 1.65787  |
| H | -5.03708 | 2.82436  | 1.39240  |
| H | -5.12696 | 4.46361  | 0.79418  |
| H | -3.19712 | 2.36147  | -0.15247 |
| H | -3.29088 | 4.00329  | -0.75088 |
| H | -2.62725 | -4.57623 | 6.71522  |
| H | -3.33322 | -3.97353 | 5.23489  |
| H | -2.65888 | -2.85815 | 6.39860  |
| H | -1.58023 | -2.39114 | 4.01980  |
| H | 0.78450  | -4.11273 | 3.61099  |
| H | -0.11985 | -3.66919 | 1.57525  |
| H | 1.10641  | -2.38026 | 1.74878  |
| H | 3.04808  | -0.16230 | 4.46289  |
| H | 1.92813  | -0.10342 | 5.81469  |
| H | 1.04610  | 3.61856  | 3.23581  |
| H | 0.93730  | 2.42854  | 1.07248  |
| H | -0.35519 | 3.53621  | 1.10875  |
| H | -1.02076 | 1.84325  | 5.04867  |
| H | -3.07295 | 3.98543  | 4.92335  |
| H | -2.51652 | 3.29349  | 6.42824  |
| H | -3.45742 | 2.32713  | 5.31743  |
| O | 1.97417  | 1.64999  | -0.98184 |
| * |          |          |          |

## References and Notes:

- (1) Xia, J. Q.; Dong, J.; Wang, S. K.; Scott, R. A.; Lindahl, P. A. *J. Am. Chem. Soc.* **1995**, *117*, 7065-7070.
- (2) Russell, W. K.; Stalhandske, C. M. V.; Xia, J. Q.; Scott, R. A.; Lindahl, P. A. *J. Am. Chem. Soc.* **1998**, *120*, 7502-7510.
- (3) Gu, W.; Gencic, S.; Cramer, S. P.; Grahame, D. A. *J. Am. Chem. Soc.* **2003**, *125*, 15343-15351.
- (4) Svetlitchnyi, V.; Dobbek, H.; Meyer-Klaucke, W.; Meins, T.; Thiele, B.; Romer, P.; Huber, R.; Meyer, O. *Proc. Natl. Acad. Sci. U.S.A.* **2004**, *101*, 446-451.
- (5) Schrapers, P.; Mebs, S.; Llina, Y.; Warner, D. S.; Wörmann, C.; Schuth, N.; Hennig, S. E.; Dau, H.; Haumann, M.; Dobbek, H. *J. Phys.: Conf. Ser.* **712**, *712*, 012029.
